# Supplementary material for: A mixed methods assessment of implementation of fluoride-citrate tubes for pregnancy oral glucose tolerance tests: glucose stabilisation improves identification of Aboriginal women requiring pharmaceutical intervention for gestational diabetes
Source: Research Square preprint supplement (doi:10.21203/rs.3.rs-7316550/v1), 2025-09-18
Supplement: Supplementary file 2 [file ba8605e07ab6d8fb9b449527.docx]

**Checklist of items to include when reporting health research involving Indigenous Peoples**

Huria, T., Palmer, S.C., Pitama, S. *et al.* Consolidated criteria for strengthening reporting of health research involving indigenous peoples: the CONSIDER statement. *BMC Med Res Methodol* **19**, 173 (2019). <https://doi.org/10.1186/s12874-019-0815-8>

FOR: **A mixed methods assessment of implementation of fluoride-citrate tubes for pregnancy oral glucose tolerance tests: glucose stabilisation improves identification of Aboriginal women requiring pharmaceutical intervention for gestational diabetes**

| **Item Checklist** | | **Page No.** | **Relevant text from manuscript** |
| --- | --- | --- | --- |
| **Governance** | |  |  |
| 1. | Describe partnership agreements between the research institution and Indigenous-governing organization for the research, (e.g., Informal agreements through to MOU (Memorandum of Understanding) or MOA (Memorandum of Agreement)). | 6 | They have provided letters of support and a research collaborative agreement, which are updated to account for new phases of the project. |
| 7 | Kimberley ACCHOs (Kimberley Aboriginal Medical Service (KAMS), Broome Regional Aboriginal Medical Service, Derby Aboriginal Health Service, Ord Valley Aboriginal Health Service, and Yura Yungi Medical Service) requested support from the ORCHID Study for the implementation and evaluation of FC tube usage. Therefore, for the audit there was a more informal approach between participating ACCHOs and the ORCHID team. This included an understanding that the project would adhere to the conditions set out in the research agreements. |
| 6 | Aboriginal culture, family and community are central to the ORCHID Study. Aboriginal Community Boards and Investigators provide Aboriginal leadership and oversight. This study, which is integrated within the major health service providers in regional, rural and remote WA, uses existing governance structures (e.g., regional Aboriginal health planning forums). It includes Aboriginal people, clinicians, administrators and policy makers as core members of the research team. Participating Aboriginal communities and ACCHOs are equal partners in the analysis, interpretation and publication of project data. They have provided letters of support and research collaborative agreements, which are updated to account for new phases of the project. Agreement details include:   - Aboriginal community and ACCHO involvement in the ORCHID Study, including monitoring the research. - Copyright and intellectual property management; a key part of the governance arrangement is adherence to the principals of Indigenous Data Sovereignty.(25) Project data and research findings belong to Aboriginal communities and ACCHOs. - Expectations of the ORCHID team (e.g., regular reports to be provided, permission to publish and disseminate project findings to be sought), and the resources we will provide.   Kimberley ACCHOs (Kimberley Aboriginal Medical Service (KAMS), Broome Regional Aboriginal Medical Service, Derby Aboriginal Health Service, Ord Valley Aboriginal Health Service, and Yura Yungi Medical Service) requested support from the ORCHID Study for the implementation and evaluation of FC tube usage. Therefore, for the audit there was a more informal approach between participating ACCHOs and the ORCHID team. This included an understanding that the project would adhere to the conditions set out in the research agreements. |
| 24 | The Kimberley ACCHOs Lead Clinicians Forum and relevant staff (antenatal clinicians, managers, CEOs) from participating ACCHOs were provided with a full draft of the paper for comment. No changes were requested. |
| 23 | The ORCHID Study was endorsed by the KAHPF Research Subcommittee. Ethics approval was obtained from the Western Australia Aboriginal Health Ethics Committee (Project reference 584) and The University of Western Australia Human Research Ethics Committee (Project reference 2019/RA/4/20/5572). The project aligns with the Australian National Health and Medical Research Council’s guidelines for ethical conduct in Aboriginal and Torres Strait Islander Hearth Research.(51) |
| 3. | Specify how the research partnership agreement includes protection of Indigenous intellectual property and knowledge arising from the research, including financial and intellectual benefits generated (e.g., development of traditional medicines for commercial purposes or supporting the Indigenous community to develop commercialization proposals generated from the research). | 6 | Agreement details include:   - Aboriginal community and ACCHO involvement in the ORCHID Study, including monitoring the research. - Copyright and intellectual property management; a key part of the governance arrangement is adherence to the principals of Indigenous Data Sovereignty.(25) Project data and research findings belong to Aboriginal communities and ACCHOs. - Expectations of the ORCHID team (e.g., regular reports to be provided, permission to publish and disseminate project findings to be sought), and the resources we will provide. |
| **Prioritization** | |  |  |
| 4. | Explain how the research aims emerged from priorities identified by either Indigenous stakeholders, governing bodies, funders, non-government organization(s), stakeholders, consumers, and empirical evidence | 4 | Pre-analytical instability of glucose in OGTT samples is a significant, yet often underappreciated factor that can impact detection of GDM.(9) Most jurisdictions in Australia rely on fluoride, a latent glycolytic inhibitor, in fluoride-oxalate (FLOX) tubes to stabilise OGTT samples. However, delays in processing FLOX samples can result in significant glycolysis,(10, 11) leading to between 40% and 62% missed pregnancies with GDM based on current criteria.(12)  Inherently long distances to laboratory analysis for women living in rural and remote locations exacerbates this diagnostic error. In the Optimisation of Rural Clinical and Haematological Indicators for Diabetes in pregnancy (ORCHID) study the median delay to laboratory processing of OGTT samples was 5-hours (2.3- to 124-hours) from fasting collection.(11) Delays were worse in remote clinics, including those in the Kimberley region of Western Australia, where 25% of OGTT samples arrived at the laboratory more than 24-hours post collection. In these settings, maximum loss of glucose impacted all three OGTT timepoints.(11) This variation in diagnostic processes due to geographical disadvantage leads to diagnostic inequity for women with GDM.(13) |
| 5 | The simplified pre-analytical process makes FC tubes a pragmatic solution for low-resource settings and rural and remote centres.(20) However, concerns have been raised about potential overdiagnosis of GDM following reports of up to 0.37 mmol/L bias in glucose measures from FC tubes compared to rapid centrifugation.(12)  In the ORCHID cohort, FC tubes were estimated to improve both GDM detection and identification of pregnancies at risk of macrosomia when compared to FLOX tubes.(21) |
| 5 | To improve pregnancy outcomes, the Kimberley Lead Clinicians Forum endorsed FC tubes for all pregnancy OGTT performed in Kimberley Aboriginal Community Controlled Health Organisations (ACCHOs) in September 2019. To date, Kimberley ACCHOs are the only healthcare providers in Australia to formally implement FC tubes.(20) To better embed the FC tubes into routine clinical practice, Kimberley ACCHOs needed to understand factors important in ‘real world’ utilisation and implementation, such as clinical support required, and clinic and laboratory staff acceptability. |
| 7 | Kimberley ACCHOs (Kimberley Aboriginal Medical Service (KAMS), Broome Regional Aboriginal Medical Service, Derby Aboriginal Health Service, Ord Valley Aboriginal Health Service, and Yura Yungi Medical Service) requested support from the ORCHID Study for the implementation and evaluation of FC tube usage. |
| **Relationships (Indigenous stakeholders/participants and Research team)** | |  |  |
| 5. | Specify measures that adhere and honor Indigenous ethical guidelines, processes, and approvals for all relevant Indigenous stakeholders, recognizing that multiple Indigenous partners may be involved, e.g., Indigenous ethics committee approval, regional/national ethics approval processes. | 7 | As the project was a retrospective clinical audit that aimed to identify areas for quality improvement collective consent was granted by each Kimberley ACCHO. They also provided approval for ORCHID team members to access their patients’ MMEx records (2024 ISA Healthcare Solutions) and Stork Perinatal Dataset Discharge Summaries. Confidentiality was a key consideration in the audit. Bulk data exports were imported into Research Electronic Database Capture (REDCap). Personal identifiers were only used to link the results of tests, reports and procedures for the same person from different locations. For manually entered data (e.g. GDM management) the medical record identifier was recorded for each patient to enable linking of batch exported data (e.g., weight, height). Results were reported on de-identified data only. |
| 23 | The ORCHID Study was endorsed by the KAHPF Research Subcommittee. Ethics approval was obtained from the Western Australia Aboriginal Health Ethics Committee (Project reference 584) and The University of Western Australia Human Research Ethics Committee (Project reference 2019/RA/4/20/5572). The project aligns with the Australian National Health and Medical Research Council’s guidelines for ethical conduct in Aboriginal and Torres Strait Islander Hearth Research.(38) |
| 18 | Broad stakeholder engagement, consultation and advocacy have been embedded in the ORCHID Study. This has included over 50 presentations to Aboriginal community members, health professionals from ACCHOs, WACHS, Diabetes WA, and laboratory staff. |
| 6. | Report how Indigenous stakeholders were involved in the research processes (i.e., research design, funding, implementation, analysis, dissemination / recruitment). | 13 | Table 3. ORCHID Study team stakeholder engagement before, during and after implementation of FC tubes |
| 6 | Participating Aboriginal communities and ACCHOs are equal partners in the analysis, interpretation and publication of project data. |
| 7 | Kimberley ACCHOs (Kimberley Aboriginal Medical Service (KAMS), Broome Regional Aboriginal Medical Service, Derby Aboriginal Health Service, Ord Valley Aboriginal Health Service, and Yura Yungi Medical Service) requested support from the ORCHID Study for the implementation and evaluation of FC tube usage. |
| 24 | The Kimberley ACCHOs Lead Clinicians Forum and relevant staff (antenatal clinicians, managers, CEOs) from participating ACCHOs were provided with a full draft of the paper for comment. No changes were requested. |
| 9 | From the start of the implementation process, ES [Aboriginal researcher] kept detailed notes on all contact with relevant stakeholders. ES and EJ provided support for ordering FC tubes, including tracking arrival and expiry dates. ORCHID Study newsletters and papers were also shared with stakeholders and ES provided friendly reminders for clinicians to use FC tubes for all pregnancy OGTTs. Clinic staff concerns were noted and followed up. All details of stakeholder contact including meeting minutes, brief reflections, and processes of developing the ORCHID Study FC tube policy guidelines were recorded by ES in the Kimberley Aboriginal Medical Services (KAMS) ‘Plan Do Study Act (PDSA) and Action Plan document’ stored on their Quality Management System (Logiqc). ORCHID co-leads (ES, EJ, JM) stored all relevant emails with ACCHOs, laboratory staff and suppliers. Clinician comments about FC tubes from another ORCHID sub-study (29) were noted. |
| 10 | Eleven Kimberley clinics implemented FC tubes for all pregnancy OGTTs in September 2019 (nine ACCHO clinics, and three remote WACHS antenatal clinics; Greiner Bio-One: Vacuette FC Mix Tube 454511, 2mL). |
| 6 | Aboriginal culture, family and community are central to the ORCHID Study. Aboriginal Community Boards and Investigators provide Aboriginal leadership and oversight. This study, which is integrated within the major health service providers in regional, rural and remote WA, uses existing governance structures (e.g., regional Aboriginal health planning forums). It includes Aboriginal people, clinicians, administrators and policy makers as core members of the research team. Participating Aboriginal communities and ACCHOs are equal partners in the analysis, interpretation and publication of project data. They have provided letters of support and research collaborative agreements, which are updated to account for new phases of the project. Agreement details include:   - Aboriginal community and ACCHO involvement in the ORCHID Study, including monitoring the research. - Copyright and intellectual property management; a key part of the governance arrangement is adherence to the principals of Indigenous Data Sovereignty.(25) Project data and research findings belong to Aboriginal communities and ACCHOs. - Expectations of the ORCHID team (e.g., regular reports to be provided, permission to publish and disseminate project findings to be sought), and the resources we will provide.   Kimberley ACCHOs (Kimberley Aboriginal Medical Service (KAMS), Broome Regional Aboriginal Medical Service, Derby Aboriginal Health Service, Ord Valley Aboriginal Health Service, and Yura Yungi Medical Service) requested support from the ORCHID Study for the implementation and evaluation of FC tube usage. Therefore, for the audit there was a more informal approach between participating ACCHOs and the ORCHID team. This included an understanding that the project would adhere to the conditions set out in the research agreements. |
| 7 | ES is a Bardi Jawi traditional owner, a mother of four, who experienced GDM with her third child. ES is employed in a joint research position through KAMS and the Rural Clinical School of WA and is based in Broome. She joined the ORCHID Study in 2016 as an Aboriginal Research Officer and is currently a Senior Aboriginal Research Officer (KAMS) and Research Fellow (UWA). She co-leads this and another diabetes project. |
| 8 | LA traces her Aboriginal heritage to the Palawa people of Tasmania. She has many years’ experience as a lead clinician in rural and remote WA and rural New Zealand. She is the Medical Director of the KAMS (from 2019), chairs the Kimberley ACCHO Lead Clinicians Forum, and supported implementation of FC tubes into routine clinical practice across Kimberley ACCHOs. |
| 14 | Regular updates were provided to all stakeholders via newsletters, in-services, webinars and plain language statements for ORCHID study publications, with links provided to all documents on the KAMS website (Table 2, Impact on GDM incidence). |
| 18 | Broad stakeholder engagement, consultation and advocacy have been embedded in the ORCHID Study. This has included over 50 presentations to Aboriginal community members, health professionals from ACCHOs, WACHS, and Diabetes WA, and laboratory staff. |
| 7. | Describe the expertise of the research team in Indigenous health and research. | 6 | Aboriginal culture, family and community are central to the ORCHID Study. Aboriginal Community Boards and Investigators provide Aboriginal leadership and oversight. This study, which is integrated within the major health service providers in regional, rural and remote WA, uses existing governance structures (e.g., regional Aboriginal health planning forums). It includes Aboriginal people, clinicians, administrators and policy makers as core members of the research team. Participating Aboriginal communities and ACCHOs are equal partners in the analysis, interpretation and publication of project data. They have provided letters of support and research collaborative agreements, which are updated to account for new phases of the project. Agreement details include:   - Aboriginal community and ACCHO involvement in the ORCHID Study, including monitoring the research. - Copyright and intellectual property management; a key part of the governance arrangement is adherence to the principals of Indigenous Data Sovereignty.(25) Project data and research findings belong to Aboriginal communities and ACCHOs. - Expectations of the ORCHID team (e.g., regular reports to be provided, permission to publish and disseminate project findings to be sought), and the resources we will provide. |
| 7 | ES is a Bardi Jawi traditional owner, a mother of four, who experienced GDM with her third child. ES is employed in a joint research position through KAMS and the Rural Clinical School of WA and is based in Broome. She joined the ORCHID Study in 2016 as an Aboriginal Research Officer and is currently a Senior Aboriginal Research Officer (KAMS) and Research Fellow (UWA). She co-leads this and another diabetes project.  EJ has been involved in diabetes research projects for 23 years. For the past 10 years she coordinated the ORCHID study from rural WA and completed her PhD on optimising screening for GDM. This included evaluating and reporting on underdiagnosis of GDM due to preanalytical glycolysis in rural and remote WA.  LA traces her Aboriginal heritage to the Palawa people of Tasmania. She has many years’ experience as a lead clinician in rural and remote WA and rural New Zealand. She is the Medical Director of the KAMS (from 2019), chairs the Kimberley ACCHO Lead Clinicians Forum, and supported implementation of FC tubes into routine clinical practice across Kimberley ACCHOs.  MH is a junior doctor who has worked in rural Western Australia for the past two years, including in antenatal care in the Great Southern region. He was involved with data collection and analysis for the retrospective audit (MD rural research student project). As part of his capacity building, he presented his MD project findings to the Kimberley ACCHO Lead Clinicians Forum.  AK is a rural General Practitioner Obstetrician (GPO) with 18 years' experience in antenatal care, including a significant number of pregnant women diagnosed with GDM. He is completing a PhD on barriers and enablers of GDM screening in regional, rural and remote WA.  JM is based in Broome and has been conducting collaborative health services research, predominately with Kimberley ACCHOs, over the past 18 years. She led the development of the ORCHID Study.  ES, EJ and JM regularly provide individual support and clinic level in-services to clinicians participating in the ORCHID Study. ES led this FC tube implementation project, supported by the other two ORCHID Study co-leads (JM, EJ). |
| 21 | The ORCHID study had been active in the Kimberley region for five years prior to FC tube implementation. |
| **Methodologies** | |  |  |
| 8. | Describe the methodological approach of the research including a rationale of methods used and implication for Indigenous stakeholders, e.g., privacy and confidentiality (individual and collective) | 5 | This study used a mixed methods approach to explore implementation outcomes using the DSF.(22) |
| 7 | As the project was a retrospective clinical audit that aimed to identify areas for quality improvement collective consent was granted by each Kimberley ACCHO. They also provided approval for ORCHID team members to access their patients’ MMEx records (2024 ISA Healthcare Solutions) and Stork Perinatal Dataset Discharge Summaries. Confidentiality was a key consideration in the audit. Bulk data exports were imported into Research Electronic Database Capture (REDCap). Personal identifiers were only used to link the results of tests, reports and procedures for the same person from different locations. For manually entered data (e.g. GDM management) the medical record identifier was recorded for each patient to enable linking of batch exported data (e.g., weight, height). Results were reported on de-identified data only. |
| 9 | The quantitative component descriptively analysed a retrospective audit of ACCHO electronic medical records (MMEx, 2024 ISA Healthcare Solutions) to explore impact of FC tube use on GDM incidence and management. |
| 9 | Acceptability,(26, 27) barriers and enablers, and resources required to support implementation were assessed using qualitative descriptive approaches.(28) |
| 9. | Describe how the research methodology incorporated consideration of the physical, social, economic and cultural environment of the participants and prospective participants. (e.g., impacts of colonization, racism, and social justice). As well as Indigenous worldviews. | 4 | Delays were worse in remote clinics, including those in the Kimberley region of Western Australia, where 25% of OGTT samples arrived at the laboratory more than 24-hours post collection. In these settings, the maximum *in vitro* loss of glucose impacted specimens all three OGTT timepoints.(11) This variation in diagnostic processes due to geographical disadvantage leads to diagnostic inequity for women with GDM.(13) |
| 4 | Improving OGTT sample stability will become even more imperative in rural and remote Australia when new elevated diagnostic criteria for GDM are implemented.(14) |
| 5 | The simplified pre-analytical process makes FC tubes a pragmatic solution for low-resource settings and rural and remote centres.(20) |
| 5 | In the ORCHID cohort, FC tubes were estimated to improve both GDM detection and identification of pregnancies at risk of macrosomia when compared to FLOX tubes.(21) To improve pregnancy outcomes, the Kimberley Lead Clinicians Forum endorsed FC tubes for all pregnancy OGTT performed in Kimberley Aboriginal Community Controlled Health Organisations (ACCHOs) in September 2019. To date, Kimberley ACCHOs are the only healthcare providers in Australia to formally implement FC tubes.(20) To better embed the FC tubes into routine clinical practice, Kimberley ACCHOs needed to understand factors important in ‘real world’ utilisation and implementation, such as clinical support required, and clinic and laboratory staff acceptability. |
| 6 | Aboriginal culture, family and community are central to the ORCHID Study. Aboriginal Community Boards and Investigators provide Aboriginal leadership and oversight. This study, which is integrated within the major health service providers in regional, rural and remote WA, uses existing governance structures (e.g., regional Aboriginal health planning forums). It includes Aboriginal people, clinicians, administrators and policy makers as core members of the research team. Participating Aboriginal communities and ACCHOs are equal partners in the analysis, interpretation and publication of project data. |
| 10 | Endorsed by the Kimberley Aboriginal Health Planning Forum (KAHPF), Kimberley Clinical Guidelines aim to standardise the screening and management of prevalent health conditions in the Kimberley. Hence, regional guidelines can differ from state or national guidelines. The KAHPF Diabetes in Pregnancy Clinical Guideline (2017), which included Australasian Diabetes in Pregnancy Society (ADIPS) 2014 screening and diagnostic recommendations, was in use throughout the audit (Table 1).(34) |
| 25 | ES led this FC tube implementation project, supported by the other two ORCHID Study co-leads (JM, EJ). |
| **Participation** | |  |  |
| 10. | Specify how individual and collective consent was sought to conduct future analysis on collected samples and data (e.g., additional secondary analyses; third-parties accessing samples (genetic, tissue, blood) for further analyses). | 6 | Aboriginal culture, family and community are central to the ORCHID Study. Aboriginal Community Boards and Investigators provide Aboriginal leadership and oversight. This study, which is integrated within the major health service providers in regional, rural and remote WA, uses existing governance structures (e.g., regional Aboriginal health planning forums). It includes Aboriginal people, clinicians, administrators and policy makers as core members of the research team. Participating Aboriginal communities and ACCHOs are equal partners in the analysis, interpretation and publication of project data. They have provided letters of support and research collaborative agreements, which are updated to account for new phases of the project. Agreement details include:   - Aboriginal community and ACCHO involvement in the ORCHID Study, including monitoring the research. - Copyright and intellectual property management; a key part of the governance arrangement is adherence to the principals of Indigenous Data Sovereignty.(25) Project data and research findings belong to Aboriginal communities and ACCHOs. - Expectations of the ORCHID team (e.g., regular reports to be provided, permission to publish and disseminate project findings to be sought), and the resources we will provide.   Kimberley ACCHOs (Kimberley Aboriginal Medical Service (KAMS), Broome Regional Aboriginal Medical Service, Derby Aboriginal Health Service, Ord Valley Aboriginal Health Service, and Yura Yungi Medical Service) requested support from the ORCHID Study for the implementation and evaluation of FC tube usage. Therefore, for the audit there was a more informal approach between participating ACCHOs and the ORCHID team. This included an understanding that the project would adhere to the conditions set out in the research agreements.  As the project was a retrospective clinical audit that aimed to identify areas for quality improvement collective consent was granted by each Kimberley ACCHO. |
| 23 | **Declarations**  **Ethics approval and consent to participate**  This study adhered to the Declaration of Helsinki. The ORCHID Study was endorsed by the KAHPF Research Subcommittee. Ethics approval was obtained from the Western Australia Aboriginal Health Ethics Committee (Project reference 584) and The University of Western Australia Human Research Ethics Committee (Project reference 2019/RA/4/20/5572). The project aligns with the Australian National Health and Medical Research Council’s guidelines for ethical conduct in Aboriginal and Torres Strait Islander Hearth Research.(51)  This study included data from two groups of participants. 1. Retrospective clinical audit: At patient registration Kimberley ACCHOs obtained consent for use of patient deidentified information to improve their clinical care through audits. As Kimberley ACCHOs requested support from the ORCHID Study for the implementation and evaluation of FC tube usage for the purpose of quality improvement, they granted collective consent for the ORCHID study to access relevant patient data. The Western Australian Aboriginal Health Ethics Committee waived requirement for individual informed consent for inclusion of this data in the audit. 2. Qualitative semi-structured interviews: All participants provided informed written consent. |
| 11. | Described how the resource demands (current and future) placed on Indigenous participants and communities involved in the research were identified and agreed upon including any resourcing for participation, knowledge, and expertise | 7 | Kimberley ACCHOs (Kimberley Aboriginal Medical Service (KAMS), Broome Regional Aboriginal Medical Service, Derby Aboriginal Health Service, Ord Valley Aboriginal Health Service, and Yura Yungi Medical Service) requested support from the ORCHID Study for the implementation and evaluation of FC tube usage. Therefore, for the audit there was a more informal approach between participating ACCHOs and the ORCHID team. This included an understanding that the project would adhere to the conditions set out in the research agreements.  As the project was a retrospective clinical audit that aimed to identify areas for quality improvement collective consent was granted by each Kimberley ACCHO. They also provided approval for ORCHID team members to access their patients’ MMEx records (2024 ISA Healthcare Solutions) and Stork Perinatal Dataset Discharge Summaries. Confidentiality was a key consideration in the audit. Bulk data exports were imported into Research Electronic Database Capture (REDCap). Personal identifiers were only used to link the results of tests, reports and procedures for the same person from different locations. For manually entered data (e.g. GDM management) the medical record identifier was recorded for each patient to enable linking of batch exported data (e.g., weight, height). Results were reported on de-identified data only. |
| 13 | FC tubes were formally endorsed for use in all pregnancy OGTTs collected by Kimberley ACCHOs following presentation of findings at the Kimberley ACCHO Lead Clinicians Forum. Endorsement was conditional on the ORCHID team providing the initial batch of FC tubes and auditing the impact of implementation. |
| 19 | GDM incidence increased 2.8-fold with FC tubes to 40% of women tested. Initially, clinicians expressed apprehension regarding the impact of potential overdiagnosis of GDM on women. Over time there was recognition of missed GDM diagnoses with FLOX tubes. They were also concerned about increased burden on staff and resources to manage patients with GDM. Remote Kimberley ACCHOs were able to accommodate the increase in workload during the T2 period. However, considering remote health workforce turnover and retention issues,(39) we cannot comment on long-term sustainability.  The shift to new elevated GDM diagnostic criteria in Australia would significantly reduce workload in the Kimberley (28% v 40% GDM cases of those tested) while still identifying most (84%) of the women who required more intensive pharmaceutical management. There is ongoing debate on GDM screening and balancing benefit and harm of treatment.(40) This includes concerns that management of women with mild hyperglycaemia may not improve birth outcomes.(41) Consequently, GDM diagnosis in these women may cause unnecessary psychological harm, including feelings of shock, distress, guilt, shame, stigma, fear and anxiety.(42) |
| 20 | Early in FC tube implementation, clinicians also raised concerns about potential increased intervention at birth. In Australia, inductions of labour have increased over the past 20 years to 34% of deliveries.(47) Most Australian women who have experienced induction of labour express a desire to avoid induction in future pregnancies.(47) The total number of inductions of labour remained similar between time periods. Notably, five stillbirths were recorded during the entire audit, but none were for women managed for GDM. |
| 12. | Specify how biological tissue and other samples including data were stored, explaining the processes of removal from traditional lands, if done, and of disposal. | 6 | Aboriginal culture, family and community are central to the ORCHID Study. Aboriginal Community Boards and Investigators provide Aboriginal leadership and oversight. This study, which is integrated within the major health service providers in regional, rural and remote WA, uses existing governance structures (e.g., regional Aboriginal health planning forums). It includes Aboriginal people, clinicians, administrators and policy makers as core members of the research team. Participating Aboriginal communities and ACCHOs are equal partners in the analysis, interpretation and publication of project data. They have provided letters of support and research collaborative agreements, which are updated to account for new phases of the project. Agreement details include:   - Aboriginal community and ACCHO involvement in the ORCHID Study, including monitoring the research. - Copyright and intellectual property management; a key part of the governance arrangement is adherence to the principals of Indigenous Data Sovereignty.(25) Project data and research findings belong to Aboriginal communities and ACCHOs. - Expectations of the ORCHID team (e.g., regular reports to be provided, permission to publish and disseminate project findings to be sought), and the resources we will provide.   Kimberley ACCHOs (Kimberley Aboriginal Medical Service (KAMS), Broome Regional Aboriginal Medical Service, Derby Aboriginal Health Service, Ord Valley Aboriginal Health Service, and Yura Yungi Medical Service) requested support from the ORCHID Study for the implementation and evaluation of FC tube usage. Therefore, for the audit there was a more informal approach between participating ACCHOs and the ORCHID team. This included an understanding that the project would adhere to the conditions set out in the research agreements.  As the project was a retrospective clinical audit that aimed to identify areas for quality improvement collective consent was granted by each Kimberley ACCHO. They also provided approval for ORCHID team members to access their patients’ MMEx records (2024 ISA Healthcare Solutions) and Stork Perinatal Dataset Discharge Summaries. Confidentiality was a key consideration in the audit. Bulk data exports were imported into Research Electronic Database Capture (REDCap). Personal identifiers were only used to link the results of tests, reports and procedures for the same person from different locations. For manually entered data (e.g. GDM management) the medical record identifier was recorded for each patient to enable linking of batch exported data (e.g., weight, height). Results were reported on de-identified data only. |
| **Capacity** | |  |  |
| 13. | Explain how the research supported the development and maintenance of Indigenous research capacity (e.g., specific funding of Indigenous researchers). | 7  25 | ES is a Bardi Jawi traditional owner, a mother of four, who experienced GDM with her third child. ES is employed in a joint research position through KAMS and the Rural Clinical School of WA and is based in Broome. She joined the ORCHID Study in 2016 as an Aboriginal Research Officer and is currently a Senior Aboriginal Research Officer (KAMS) and Research Fellow (UWA). She co-leads this and another diabetes project.  ES led this FC tube implementation project, supported by JM and EJ |
| 14. | Discuss how the research team undertook professional development opportunities to develop the capacity to partner with Indigenous stakeholders? | 8 | MH is a junior doctor who has worked in rural Western Australia for the past two years, including in antenatal care in the Great Southern region. He was involved with data collection and analysis for the retrospective audit (MD Scholarly Activity by research project). As part of his capacity building, he presented his MD project findings to the Kimberley ACCHO Lead Clinicians Forum. |
| 8 | EJ has been involved in diabetes research projects for the past 23 years. For the past 10 years she coordinated the ORCHID study from rural WA and completed her PhD on optimising screening for GDM. This included evaluating and reporting on underdiagnosis of GDM due to preanalytical glycolysis in rural and remote WA. She led data collection and analysis for the retrospective audit. |
| **Analysis and interpretation** | |  |  |
| 15. | Specify how the research analysis and reporting supported critical inquiry and a strength-based approach that was inclusive of Indigenous values. | 6 | Aboriginal culture, family and community are central to the ORCHID Study. Aboriginal Community Boards and Investigators provide Aboriginal leadership and oversight. This study, which is integrated within the major health service providers in regional, rural and remote WA, uses existing governance structures (e.g., regional Aboriginal health planning forums). It includes Aboriginal people, clinicians, administrators and policy makers as core members of the research team. Participating Aboriginal communities and ACCHOs are equal partners in the analysis, interpretation and publication of project data. They have provided letters of support and research collaborative agreements, which are updated to account for new phases of the project. Agreement details include:  • Aboriginal community and ACCHO involvement in the ORCHID Study, including monitoring the research.  • Copyright and intellectual property management; a key part of the governance arrangement is adherence to the principals of Indigenous Data Sovereignty. (25) Project data and research findings belong to Aboriginal communities and ACCHOs.  • Expectations of the ORCHID team (e.g., regular reports to be provided, permission to publish and disseminate project findings to be sought), and the resources we will provide.  Kimberley ACCHOs (Kimberley Aboriginal Medical Services, Broome Regional Aboriginal Medical Service, Derby Aboriginal Health Service, Ord Valley Aboriginal Health Service, and Yura Yungi Medical Service) requested support from the ORCHID Study for the implementation and evaluation of FC tube usage. Therefore, for the audit there was a more informal approach between participating ACCHOs and the ORCHID team. This included an understanding that the project would adhere to the conditions set out in the research agreements. |
| 24 | The Kimberley ACCHOs Lead Clinicians Forum and relevant staff (antenatal clinicians, managers, CEOs) from participating ACCHOs were provided with a full draft of the paper for comment. No changes were requested. |
| 25 | ES led this implementation project, supported by JM and EJ. |
| 13 | Findings were immediately communicated with the KAMS Medical Director who provided initial endorsement for adoption of FC tubes. |
| **Dissemination** | |  |  |
| 16. | Describe the dissemination of the research findings to relevant Indigenous governing bodies and peoples. | 6 | Aboriginal culture, family and community are central to the ORCHID Study. Aboriginal Community Boards and Investigators provide Aboriginal leadership and oversight. This study, which is integrated within the major health service providers in regional, rural and remote WA, uses existing governance structures (e.g., regional Aboriginal health planning forums). It includes Aboriginal people, clinicians, administrators and policy makers as core members of the research team. Participating Aboriginal communities and ACCHOs are equal partners in the analysis, interpretation and publication of project data. They have provided letters of support and research collaborative agreements, which are updated to account for new phases of the project. Agreement details include:   - Aboriginal community and ACCHO involvement in the ORCHID Study, including monitoring the research. - Copyright and intellectual property management; a key part of the governance arrangement is adherence to the principals of Indigenous Data Sovereignty. (25) Project data and research findings belong to Aboriginal communities and ACCHOs. - Expectations of the ORCHID team (e.g., regular reports to be provided, permission to publish and disseminate project findings to be sought), and the resources we will provide. |
| 24 | The Kimberley ACCHOs Lead Clinicians Forum and relevant staff (antenatal clinicians, managers, CEOs) from participating ACCHOs were provided with a full draft of the paper for comment. No changes were requested. |
| 13 | After obtaining support from all relevant stakeholders (Table 3) |
| 13 | Table 3. ORCHID Study team stakeholder engagement before, during and after implementation of FC tubes |
| 13 | Findings were immediately communicated with the KAMS Medical Director who provided initial endorsement for adoption of FC tubes. |
| 14 | Regular updates were provided to all stakeholders via newsletters, in-services, webinars and plain language statements for ORCHID study publications, with links provided to all documents on the KAMS website (Table 2, Impact on GDM incidence). |
| 18 | Broad stakeholder engagement, consultation and advocacy have been embedded in the ORCHID Study. This has included over 50 presentations to Aboriginal community members, health professionals from ACCHOs, WACHS, and Diabetes WA, and laboratory staff. |
| 17. | Discuss the process for knowledge translation and implementation to support Indigenous advancement (e.g., research capacity, policy, investment). | 13 | To support sustainable implementation, we developed a PDSA Plan as per KAMS continuous quality improvement processes. This included creating a new policy document, resources and providing inductions for new KAMS remote clinicians (Table 2, Clinic systems and training). The ORCHID team provided prompt responses to clinicians regarding use of FC tubes and concerns regarding a perceived GDM over-diagnosis (Table 2, Impact on GDM incidence). |
| 17 | This was addressed either by clinicians informing the ORCHID team and team members liaising with the pathology laboratory, or central pathology staff identifying the issue and reminding local Kimberley pathology staff. To rectify this at a system level the ORCHID team communicated all these issues with central pathology staff as they occurred and continued to advocate for collection guidelines to be updated (03/04/2024). |
| 17 | In the first year of implementation, excess FC tubes from the ORCHID paired sample study were provided to Kimberley ACCHOs. During the study the ORCHID team experienced delays in receiving tubes from the Australian distributor. The tubes could take up to three months from ordering to arrive in the Kimberley region, reducing shelf life on receipt. Ordering systems were put in place to address these issues (Table 2, Supply chain). As FC tubes are a special item the ORCHID team continue to provide ongoing support. |
| 18 | Broad stakeholder engagement, consultation and advocacy have been embedded in the ORCHID Study. This has included over 50 presentations to Aboriginal community members, health professionals from ACCHOs, WACHS, and Diabetes WA, and laboratory staff. This engagement led to JM and EJ being invited to join the National Harmonisation Glucose Preanalytical Working Party, and preparation of a review paper assessing impact of variations in specimen handling on GDM diagnosis.(12) Supporting changes to Australian blood sample collection protocols to improve accuracy of glucose measurements, the publication will be the cornerstone of the Working Group’s position statement for Australian Pathology providers. The Working Group was invited to advise on the revision of Australasian Diabetes in Pregnancy Society consensus guidelines for the testing and diagnosis of GDM in Australia (personal communication). The ORCHID team continues to advocate for FC tubes in OGTTs across Australia, while still supporting KAMS and member services in the use of FC tubes. |
| 21 | High staff turnover of clinic staff and subsequent institutional amnesia was factored into the implementation of FC tubes. This was addressed through regular communication with clinic staff, including in-services to antenatal clinicians on ORCHID Study findings. |
