# Supplementary material for: A mixed methods assessment of implementation of fluoride-citrate tubes for pregnancy oral glucose tolerance tests: glucose stabilisation improves identification of Aboriginal women requiring pharmaceutical intervention for gestational diabetes
Source: Research Square preprint supplement (doi:10.21203/rs.3.rs-7316550/v1), 2025-09-18
Supplement: Supplementary file 3 [file f9d5aa9ee58e27a93ac347a9.docx]

**Supplementary Table 1. Obstetric and newborn outcomes, before and after FC tube implementation (T1 and T2 periodsƗ respectively)**

| **Outcome** | **No OGTT**  ***N* = 348** | **T1 (FLOX)**  ***N* = 192** | **T2 (FC)**  ***N =* 180** | ***P*-value** |
| --- | --- | --- | --- | --- |
| **Adverse obstetric outcome** |  |  |  |  |
| Pre-eclampsia | 7 (2.0%) | 5 (2.6%) | 4 (2.2%) | 0.570 |
| Induction of labour (IOL) | 95 (27.3%) | 78 (40.6%) | 84 (46.7%) | 0.152 |
| Gestation at IOL (weeks) | 39.0 ± 1.7 | 38.8 ± 1.6 | 38.8 ± 1.4 | 0.921 |
| Augmentation of labourǂ | 61 (20.6%) | 30 (17.2%) | 19 (12.4%) | 0.112 |
| Caesarean delivery |  |  |  |  |
| Primary | 73 (21.0%) | 33 (17.2%) | 45 (25.0%) | 0.100 |
| Repeat§ | 32 (13.9%) | 13 (10.3%) | 15 (13.7%) | 0.416 |
| **Newborn outcome** |  |  |  |  |
| Gestational age at delivery (weeks)¶ | 38.5 ± 2.1 | 38.8 ± 1.6 | 38.6 ± 1.6 | 0.182 |
| Birthweight (g)# | 3019 ± 595 | 3193 ± 563 | 3185 ± 569 | 0.901 |
| Length (cm)ƗƗ | 49 ± 4 | 50 ± 5 | 50 ± 5 | 0.416 |
| Head circumference (cm)ǂǂ | 34 ± 2 | 34 ± 5 | 34 ± 5 | 0.644 |
| Sex – Male§§ | 165 (47.9%) | 97 (51.3%) | 90 (50.5%) | 0.884 |
| **Adverse newborn outcomes** |  |  |  |  |
| Stillbirth | 3 (0.9%) | 0 | 2 (1.1%) | 0.143 |
| LGA¶¶ | 20 (5.9%) | 21 (10.4%) | 25 (14.0%) | 0.286 |
| SGA¶¶ | 69 (20.2%) | 29 (15.1%) | 30 (16.8%) | 0.646 |
| Clinical neonatal hypoglycaemia | 41 (11.8%) | 15 (7.8%) | 18 (10.0%) | 0.458 |
| Shoulder dystocia | 4 (1.2%) | 8 (4.2%) | 6 (3.3%) | 0.673 |
| Respiratory distress | 40 (11.5%) | 21 (10.9%) | 18 (10.0%) | 0.768 |
| Intensive neonatal care | 62 (17.8%) | 32 (16.7%) | 21 (11.7%) | 0.168 |

ƗT1 time period = OGTT collection between 01/09/2017 and 31/08/2019; T2 time period = OGTT collection between 01/10/2019 and 30/09/2021.

Data are mean ± standard deviation for continuous variables and number and proportion (%) of group for categorical variables. Two-sided t-test *P*-value reported for comparison between T1 and T2 groups for continuous data and Pearson chi-square test *P*-value reported for comparison between T1 and T2 groups for categorical data. Data includes women withbirth outcome records available: 348 women with no OGTT; 192 women in the T1 period; and 180 women in the T2 period.

ǂDenominator for augmentation of labour includes only women who laboured: 296 (no OGTT); 174 (T1); and 153 (T2).

§Denominator for repeat caesarean delivery includes only women of parity (prior delivery ≥20 weeks) ≥1: 239 (no OGTT); 126 (T1); and 109 (T2).

¶Gestational age at delivery recorded for 3 pregnancies in the No OGTT group and 1 pregnancy in the T2 group.

#Birthweight not recorded for 2 infants in the No OGTT group.

ƗƗLength not recorded for 21 infants in the No OGTT group, 4 infants in the T1 group and 11 infants in the T2 group.

ǂǂHead circumference not recorded for 22 infants in the No OGTT group, 4 infants in the T1 group and 10 infants in the T2 group.

§§Infant sex not recorded for 7 infants in the No OGTT group, 3 infants in T1 group and 2 infants in T2 group

¶¶Large for gestational age (LGA) >90th centile; Small for gestational age (SGA) <10th centile. Growth for gestational age not able to be calculated for 7 infants in the No OGTT group and 2 infants in T2 period.
